# Supplementary material
Source: publisher figshare collection journal article supplement (https://acs.figshare.com/ndownloader/files/3991699)
Supplement: Supplementary file 1 [file 3991699]

## Supporting Information

### Conformational modifications of gB from Herpes simplex virus type 1 analyzed by synthetic peptides

Marco Cantisani<sup>1,2,4†</sup>, Annarita Falanga<sup>1,3†</sup>, Novella Incoronato<sup>5</sup>, Luigi Russo<sup>5</sup>, Alfonso De Simone<sup>6</sup>, Giancarlo Morelli<sup>1,2,7</sup>, Rita Berisio<sup>7</sup>, Massimiliano Galdiero<sup>2,5\*</sup>, Stefania Galdiero<sup>1,2,3,7\*</sup>

<sup>1</sup>Department of Pharmacy, <sup>2</sup>CIRPEB and <sup>3</sup>DFM Scarl, - University of Naples “Federico II”, Via Mezzocannone 16, 80134, Napoli, Italy

<sup>4</sup>Center for Advanced Materials for Health Care IIT@CRIB, Istituto Italiano di Tecnologia, L.g Barsanti e Matteucci 52, 80125, Napoli

<sup>5</sup>Department of Experimental Medicine - II University of Naples, Via De Crecchio 7, 80138, Napoli, Italy <sup>6</sup> Division of Molecular Biosciences, Imperial College London, SW7 2AZ, UK.

<sup>7</sup>Istituto di Biostrutture e Bioimmagini – CNR, Via Mezzocannone 16, 80134, Napoli, Italy

<sup>†</sup>M.C. and A.F. contributed equally to the study

#### Supporting Information Contents:

- Figure S1
- Figure S2
- Table S3

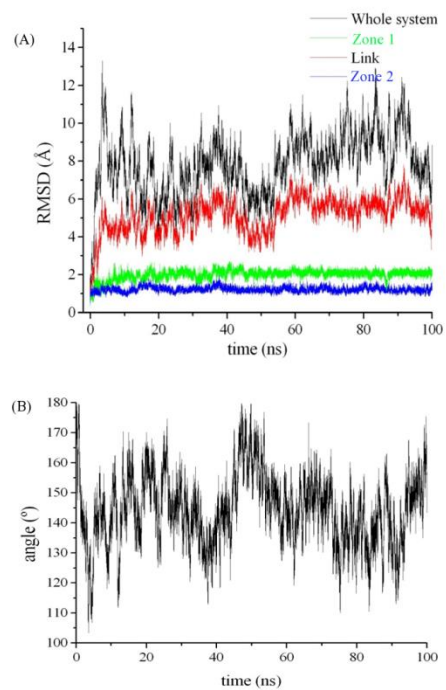

**Figure S1.** (A) RMSD values computed for the entire molecule and for individual zones with the OPLS force field. (B) Analysis of the bending angle throughout the MD simulations using the OPLS force field. The bending angle is defined as the angle generated by the centres of mass of the Zone 1, Zone 2 and Link regions.

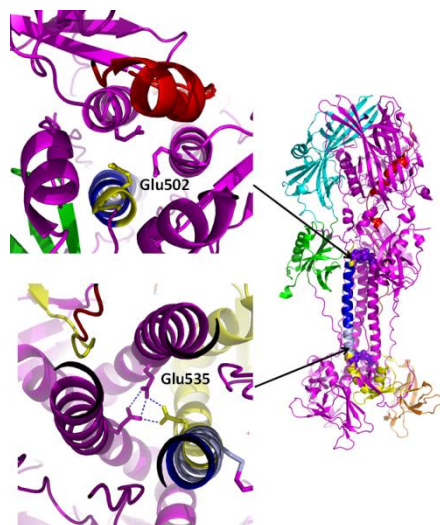

**Figure S2.** Cartoon representation of gB post-fusion structure. The two insets show the two patches of Glu residues at the two extremities of the central coiled coil.

Table S1. Pka values calculated using the software PropKa 3.1 and the PDB structure 2gum.

| <b>Residue<br/>(chain)</b> | <b>pK<sub>a</sub></b> | <b>% Burial</b> | <b>H-bonding<br/>interactions (chain)</b> | <b>Coulombic<br/>interactions (chain)</b> |
|----------------------------|-----------------------|-----------------|-------------------------------------------|-------------------------------------------|
| Glu 535 (A)                | 5.85                  | 100             | Glu 535 (B)                               |                                           |
| Glu 535 (B)                | 10.59                 | 100             | Glu 535 (C)                               | Glu 535 A                                 |
| Glu 535 (C)                | 15.16                 | 100             | Glu 535 (B)                               | Glu 535 B                                 |
| Glu 502 (A)                | 6.87                  | 100             | Ser 500 (C)                               | Arg 505 B                                 |
| Glu 502 (B)                | 9.54                  | 100             |                                           | Arg 505 C                                 |
| Glu 502 (C)                | 8.27                  | 100             | Ser 500 (B)                               | Arg 505 A                                 |
